# Supplementary material
Source: PubMed Central journal article supplement (PMC3346474)
Supplement: supp_78.9.3469_AEM00018-12-s01.pdf [file supp_78.9.3469_AEM00018-12-s01.pdf]

337 **Supplementary Material**

338

339 **Table S1.** Oligonucleotides used in this study.

| Oligonucleotide       | Sequence (5'→3')                                    | Application                                            |
|-----------------------|-----------------------------------------------------|--------------------------------------------------------|
| AMI-1                 | ATTATGGAGGATCCGACAATGCAAG                           | Amplification<br>of <i>lysH5</i>                       |
| AMI-2                 | GACTCACTGCAGTTTTATATTAACGT                          |                                                        |
| Lcn-AMI               | TACTGGGATCCAAC TTTTATAATTTATG                       | Amplification<br>of SP <sub>Lcn972</sub>               |
| Lcn-AMI-3             | CTCTTTTTTAGTTAGTTTTGCTTGCATAGCTTGAGCTACAAT<br>TCC   |                                                        |
| AMI-2                 | GACTCACTGCAGTTTTATATTAACGT                          | Amplification<br>of <i>lysH5</i> for<br>fusion PCR     |
| AMI-7                 | ATGCAAGCAAACTAACTAAAAAAG                            |                                                        |
| pAB0169 <i>Bam</i> HI | CCGAATCTAGAGGGATTCAAAAATTAAC                        | Amplification<br>of P <sub>IImg0169</sub><br>promoter  |
| pAB2164 <i>Sma</i> I  | CCATGGTACCCGGGAGCTCGAATT                            |                                                        |
| Lcn-Lys-1             | ACTGGAGCTCTGTAAGGAGGACTGACTGATGAAAACAAAA<br>TCATTAG | Amplification<br>of SP <sub>Lcn972</sub> -<br>LysH5opt |
| Lcn-Lys-2             | GGTACCCTGCAGTTATGAAATTTAC                           |                                                        |

340

341
